# Supplementary material for: Mg storage properties of hollow copper selenide nanocubes
Source: Royal Society of Chemistry journal article supplement (doi:10.1039/d0dt02280b), 2020-01-01
Supplement: d0dt02280b1.pdf [file d0dt02280b1.pdf]

## Electronic Supplementary Information

### Mg-storage properties of hollow copper selenide nanocubes

Jingwei Shen,<sup>a</sup> Dong Chen,<sup>a</sup> Shun-an Cao,<sup>a</sup> Ting Li,<sup>\*b</sup> Wei Luo,<sup>c</sup> Fei Xu<sup>\*a</sup>

<sup>a</sup> Key Laboratory of Hydraulic Machinery Transients, Ministry of Education, School of Power and Mechanical Engineering, Wuhan University, Wuhan 430072, China.

<sup>b</sup> Key Laboratory of Catalysis and Materials Science of the State Ethnic Affairs Commission & Ministry of Education, College of Chemistry and Materials Science, South-Central University for Nationalities, Wuhan 430074, China.

<sup>c</sup> College of Chemistry and Molecular Sciences, Wuhan University, Wuhan 430072, China.

\* E-mail:

Fei Xu (xufei2058@whu.edu.cn)

Ting Li (liting@mail.scuec.edu.cn)

**Supplementary data:** Additional figures and tables as mentioned in the text

## 1. Full XPS spectra.

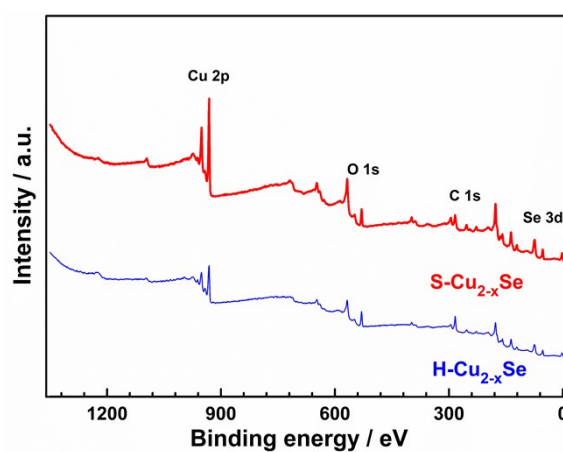

**Fig. S1** Full XPS spectra of H-Cu<sub>2-x</sub>Se and S-Cu<sub>2-x</sub>Se.

## 2. Rate capability of S-Cu<sub>2-x</sub>Se.

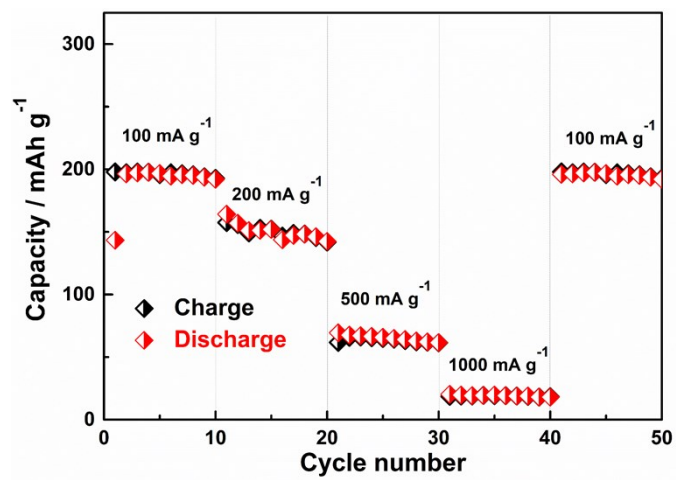

**Fig. S2** Rate capability of S-Cu<sub>2-x</sub>Se at different current densities from 100 to 1000 mA g<sup>-1</sup>. The test started from an activated S-Cu<sub>2-x</sub>Se.

### 3. Charge/discharge curves for the rate performance

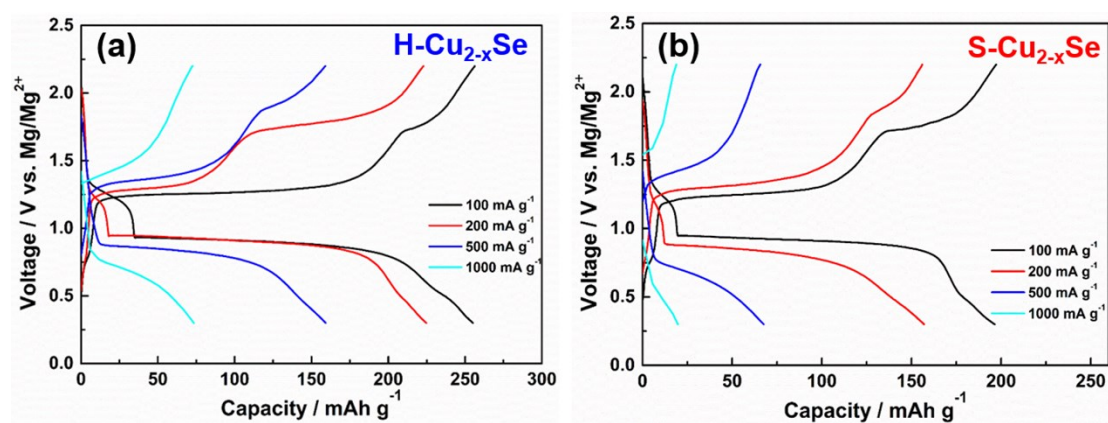

**Fig. S3** Charge/discharge curves for rate performance of (a) H-Cu<sub>2-x</sub>Se and (b) S-Cu<sub>2-x</sub>Se.

#### 4. Determination of $\text{Mg}^{2+}$ diffusion coefficients for $\text{H-Cu}_{2-x}\text{Se}$ and $\text{S-Cu}_{2-x}\text{Se}$ .

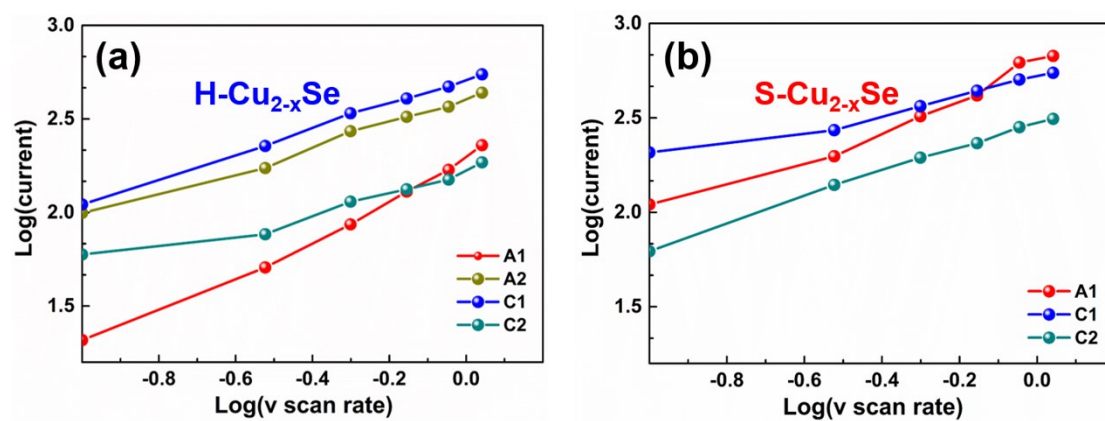

**Fig. S4**  $\text{Log}(i)$  vs.  $\text{log}(v)$  plots for different redox peaks of  $\text{H-Cu}_{2-x}\text{Se}$  and  $\text{S-Cu}_{2-x}\text{Se}$  electrodes.

**Table S1** Calculation of Mg<sup>2+</sup> diffusion coefficients

| peak | H-Cu <sub>2-x</sub> Se |                                                  | S-Cu <sub>2-x</sub> Se |                                                   |
|------|------------------------|--------------------------------------------------|------------------------|---------------------------------------------------|
|      | $i_p/v^{1/2}$          | $D (\times 10^{-9} \text{ cm}^2 \text{ s}^{-1})$ | $i_p/v^{1/2}$          | $D (\times 10^{-10} \text{ cm}^2 \text{ s}^{-1})$ |
| A1   | 0.2764                 | 4.3124                                           | 0.8086                 | 16.4032                                           |
| A2   | 0.4609                 | 11.9911                                          | /                      | /                                                 |
| C2   | -0.1693                | 1.6179                                           | -0.3429                | 2.9498                                            |
| C1   | -0.5940                | 19.9167                                          | -0.4871                | 5.9525                                            |

The diffusion coefficient of Mg<sup>2+</sup> is calculated by the following equation:

$$i_p = 2.69 \times 10^5 n^{3/2} A D^{1/2} v^{1/2} C_0$$

where  $i_p$  is the peak current (A),  $n$  is the number of electrons per molecule during the reaction,  $A$  (cm<sup>2</sup>) is the contact area between the electrode and electrolyte,  $D$  is the diffusion coefficient of Mg<sup>2+</sup> (cm<sup>2</sup> s<sup>-1</sup>),  $C_0$  (mol cm<sup>-3</sup>) is the concentration of Mg<sup>2+</sup> ion in the electrode material, and  $v$  is the scan rate (V s<sup>-1</sup>).
